# Supplementary material for: Gold(I) N-heterocyclic carbene precursors for focused electron beam-induced deposition
Source: publisher site journal article supplement (doi:10.3762/bjnano.12.21), 2021-03-17
Supplement: Additional file 1 [file 2190-4286-12-21-S1.pdf]

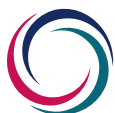

## Supporting Information

for

### **Gold(I) N-heterocyclic carbene precursors for focused electron beam-induced deposition**

Cristiano Glessi, Aya Mahgoub, Cornelis W. Hagen and Mats Tilset

*Beilstein J. Nanotechnol.* **2021**, *12*, 257–269. [doi:10.3762/bjnano.12.21](https://doi.org/10.3762/bjnano.12.21)

## Additional experimental data

## Table of content:

|                                                                                                 |     |
|-------------------------------------------------------------------------------------------------|-----|
| NMR characterization and cold finger sublimation experiments of the precursors <b>1–7</b> ..... | S3  |
| <b>1</b> (Cl,Me)AuCl.....                                                                       | S3  |
| <b>2</b> (Cl,Et)AuCl .....                                                                      | S4  |
| <b>3</b> (Cl,iPr)AuCl .....                                                                     | S5  |
| <b>4</b> (Cl,Et)AuBr .....                                                                      | S6  |
| <b>5</b> (Cl,Et)AuI.....                                                                        | S9  |
| <b>6</b> (N,Et)AuCl.....                                                                        | S12 |
| <b>7</b> (Cl,Et)AuCF <sub>3</sub> .....                                                         | S16 |
| Supplemental deposition data for <b>1–7</b> .....                                               | S19 |

# NMR characterization and cold finger sublimation experiments of the precursors 1–7

## 1 (Cl,Me)AuCl

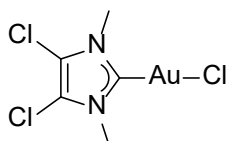

Sublimation. From top to bottom in order: **1**, sublimed obtained for three different experiments at a registered temperature of: 100.7 °C, 99.6 °C, 100.9 °C.

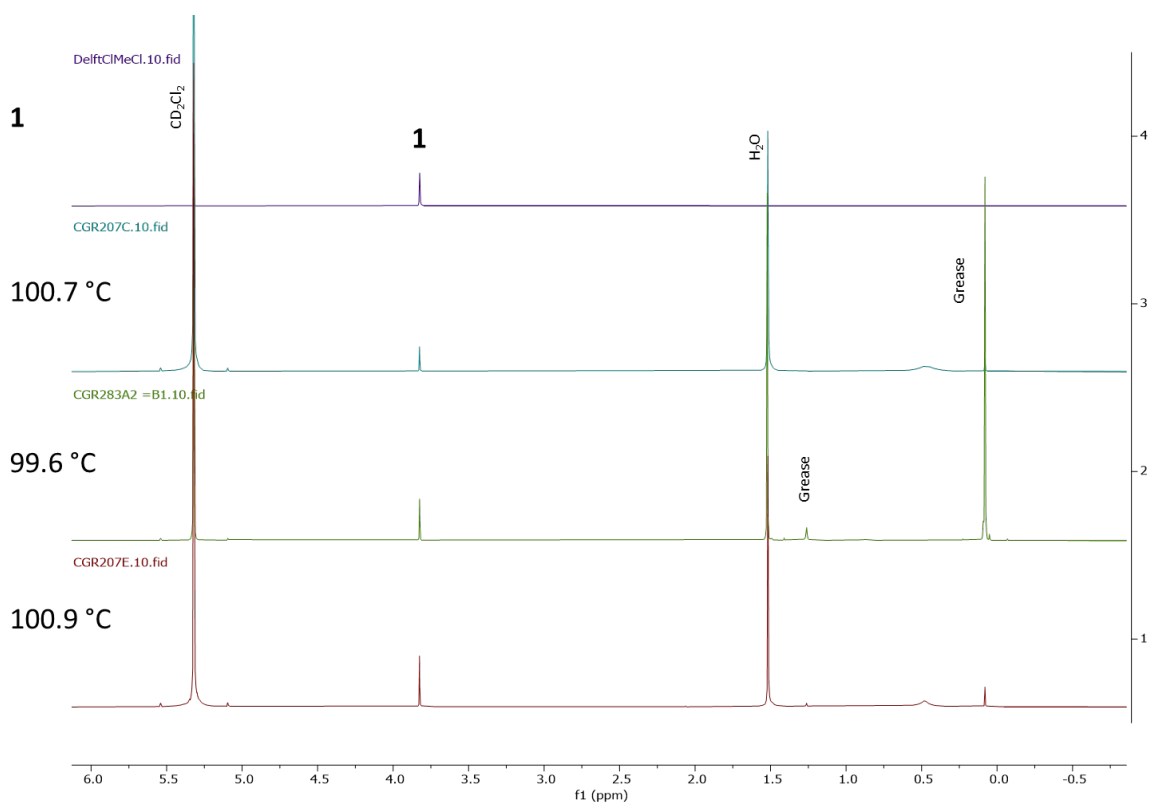

**Figure S1:**  $^1\text{H}$  NMR spectra stack plot for **1** and the obtained sublimation materials (400 MHz or 300 MHz,  $\text{CD}_2\text{Cl}_2$ ).

## 2 (Cl,Et)AuCl

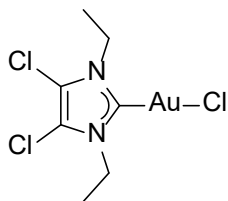

Elemental analysis: Calcd. for  $C_7H_{10}AuCl_3N_2$ : C, 19.76; H, 2.37; N, 6.58%. Found: C, 19.80; H, 2.35; N, 6.56%.

Sublimation. From top to bottom in order: **2**, sublimed obtained for three different experiments at a registered temperature of: 78.3 °C, 78.3 °C, 78.2 °C.

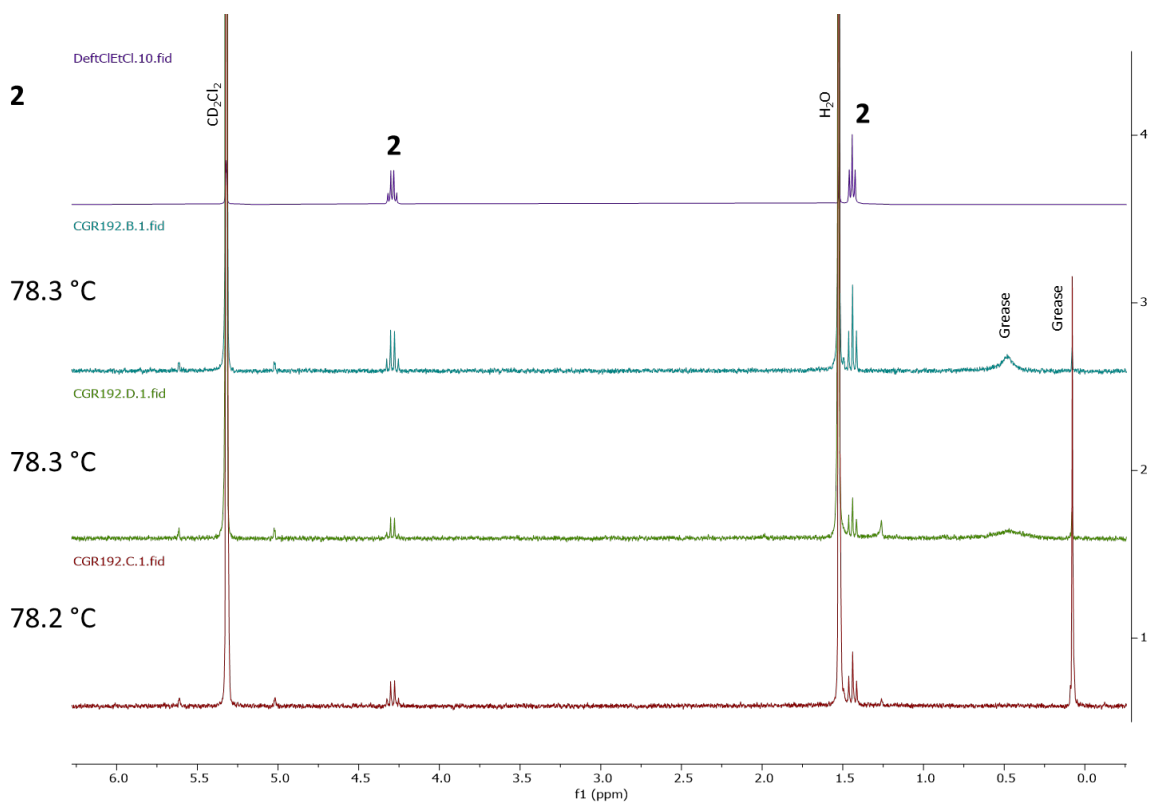

**Figure S2:**  $^1H$  NMR spectra stack plot for **2** and the obtained sublimation materials (400 MHz or 300 MHz,  $CD_2Cl_2$ ).

### 3 (Cl,iPr)AuCl

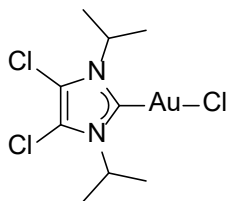

Elemental analysis: Calcd. for  $C_9H_{14}AuCl_3N_2$ : C, 23.83; H, 3.11; N, 6.18%. Found: C, 23.81; H, 3.09; N, 6.19%.

Sublimation. From top to bottom in order: **3**, sublimed obtained for three different experiments at a registered temperature of: 75.2 °C, 76.2 °C, 75.2 °C.

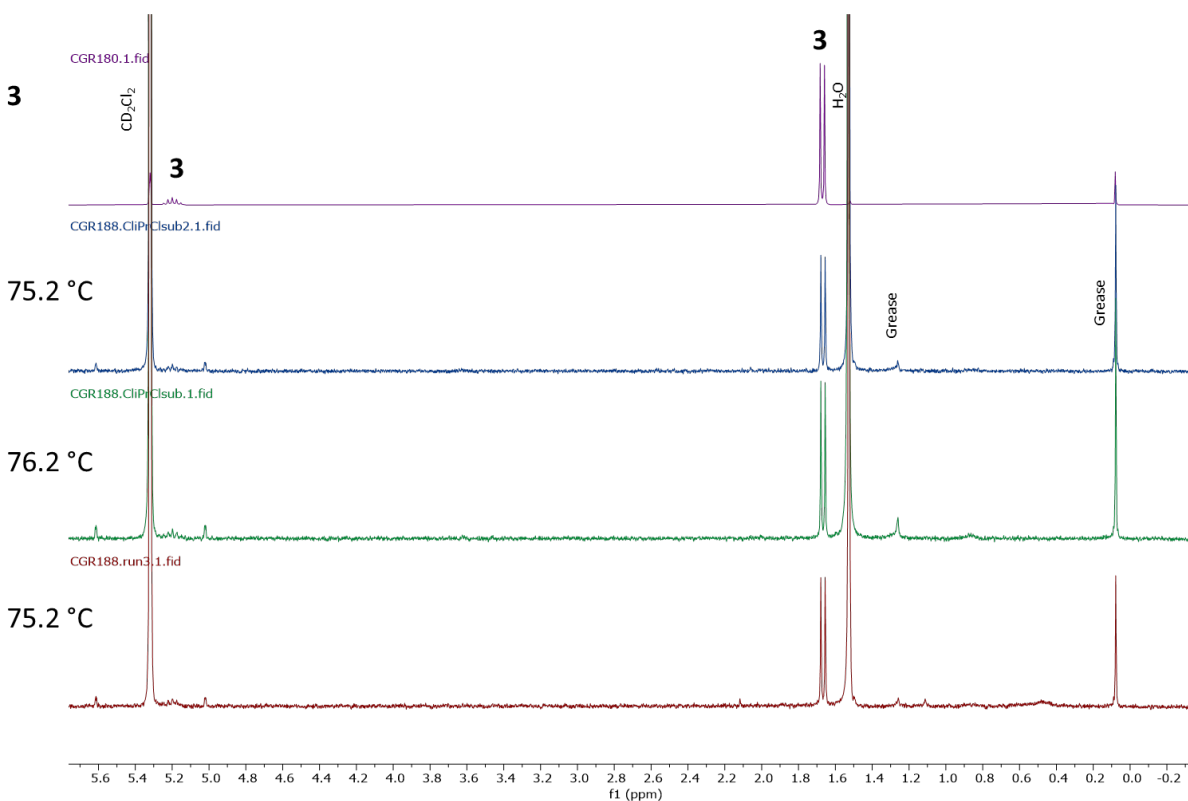

**Figure S3:**  $^1H$  NMR spectra stack plot for **3** and the obtained sublimation materials (400 MHz or 300 MHz,  $CD_2Cl_2$ ).

## 4 (Cl,Et)AuBr

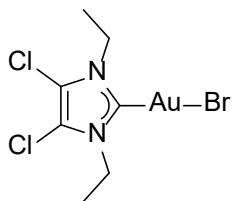

CGR94.10.fid

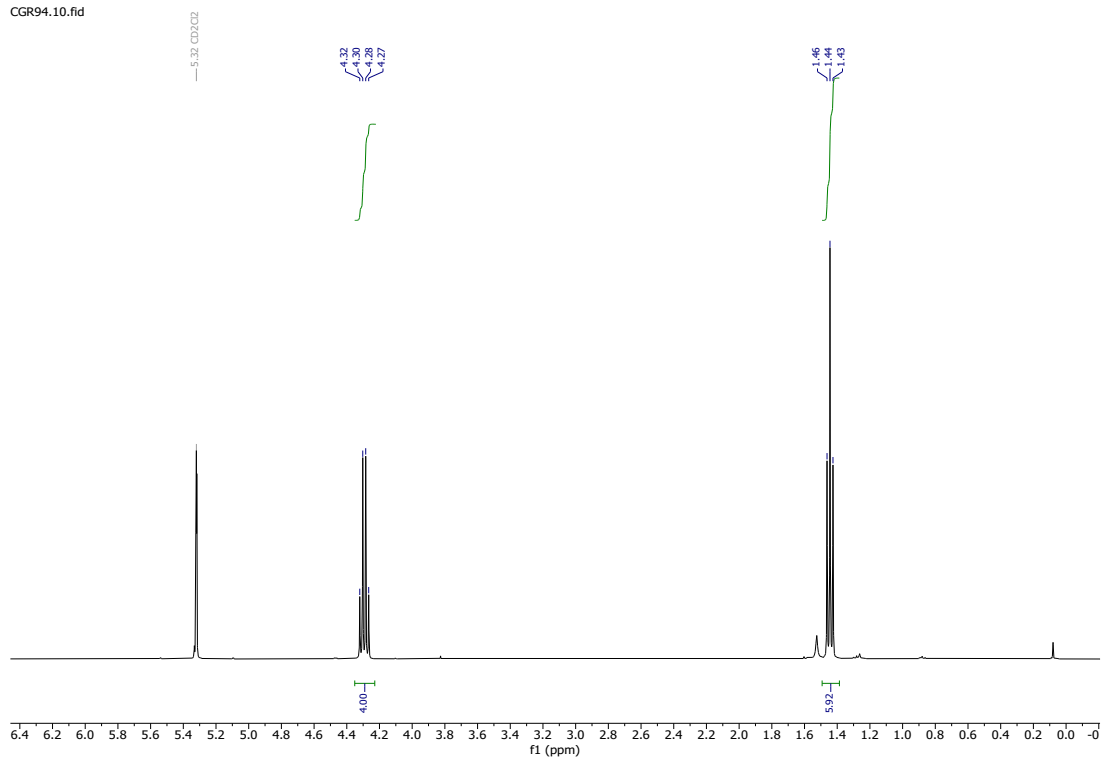

**Figure S4:** <sup>1</sup>H NMR spectrum of **4** (400 MHz, CD<sub>2</sub>Cl<sub>2</sub>).

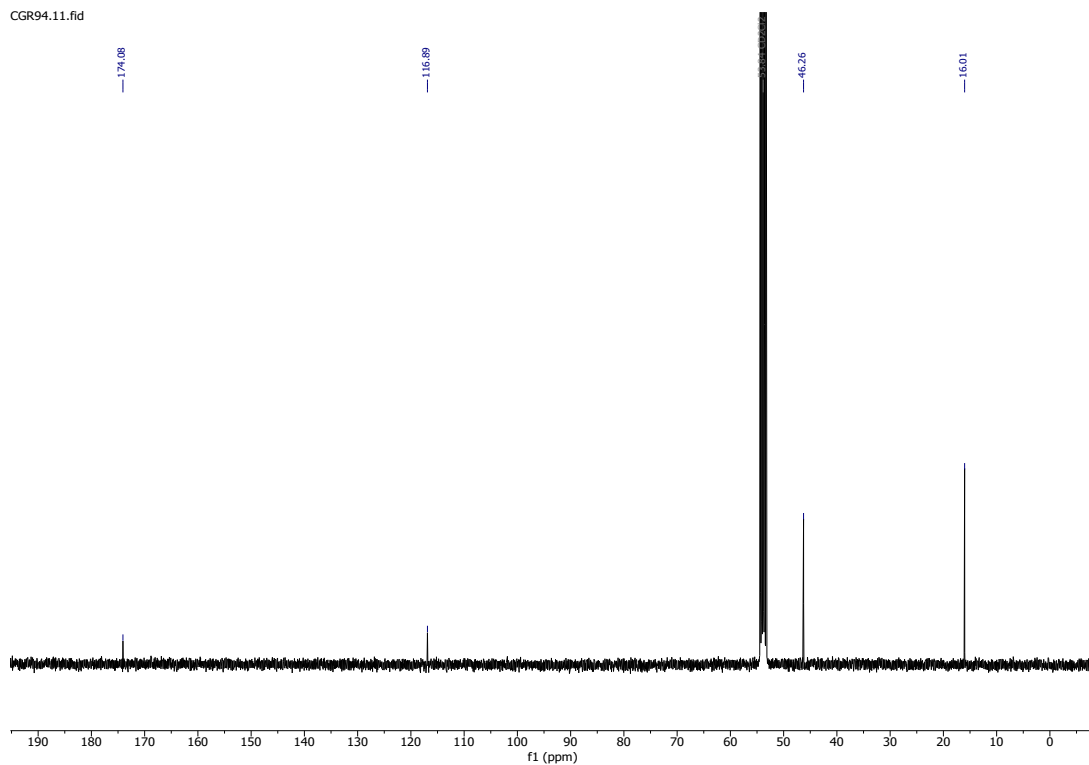

**Figure S5:**  $^{13}\text{C}$  NMR spectrum of **4** (101 MHz,  $\text{CD}_2\text{Cl}_2$ ).

Sublimation. From top to bottom in order: **4**, sublimed obtained for three different experiments at a registered temperature of: 77.3 °C, 77.2 °C, 77.4 °C.

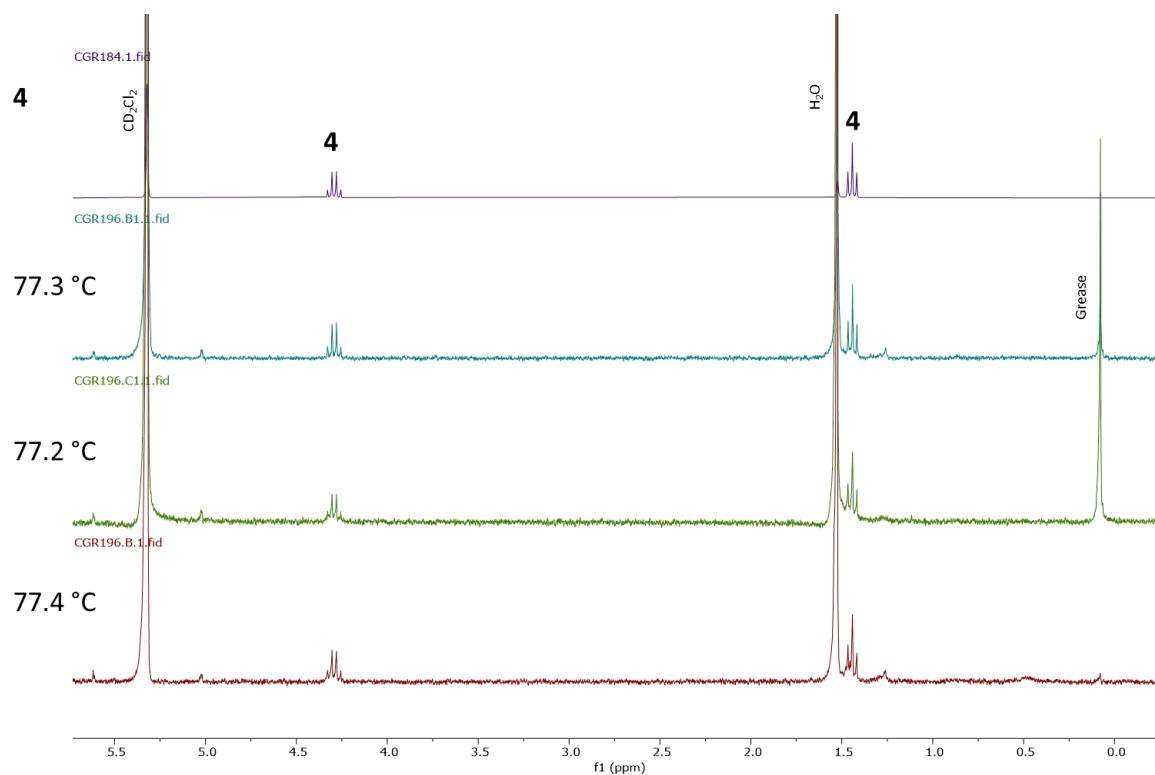

**Figure S6:** <sup>1</sup>H NMR spectra stack plot for **4** and the obtained sublimation materials (400 MHz or 300 MHz, CD<sub>2</sub>Cl<sub>2</sub>).



## 5 (Cl,Et)AuI

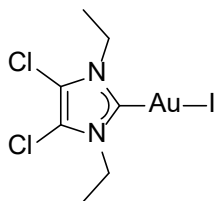

ClEtI.Delftbig\_10.fid  
PROTON128 CD2Cl2 {D:\uio\AVI1600-04} cristigl 21

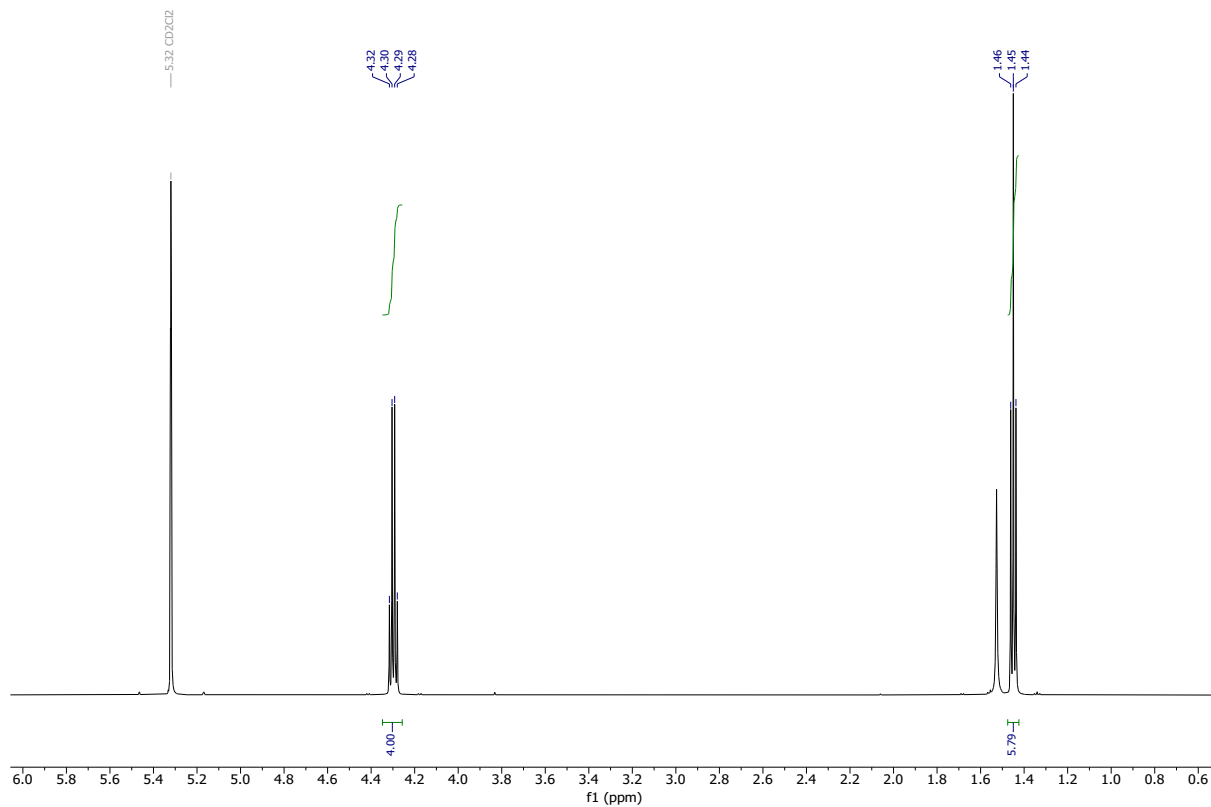

**Figure S7:** <sup>1</sup>H NMR spectrum of **5** (600 MHz, CD<sub>2</sub>Cl<sub>2</sub>).

CIEI.Delftbig.11.fid  
C13RESPECT CD2Cl2 {D:\uio\AVI1600-04} cristigl 21

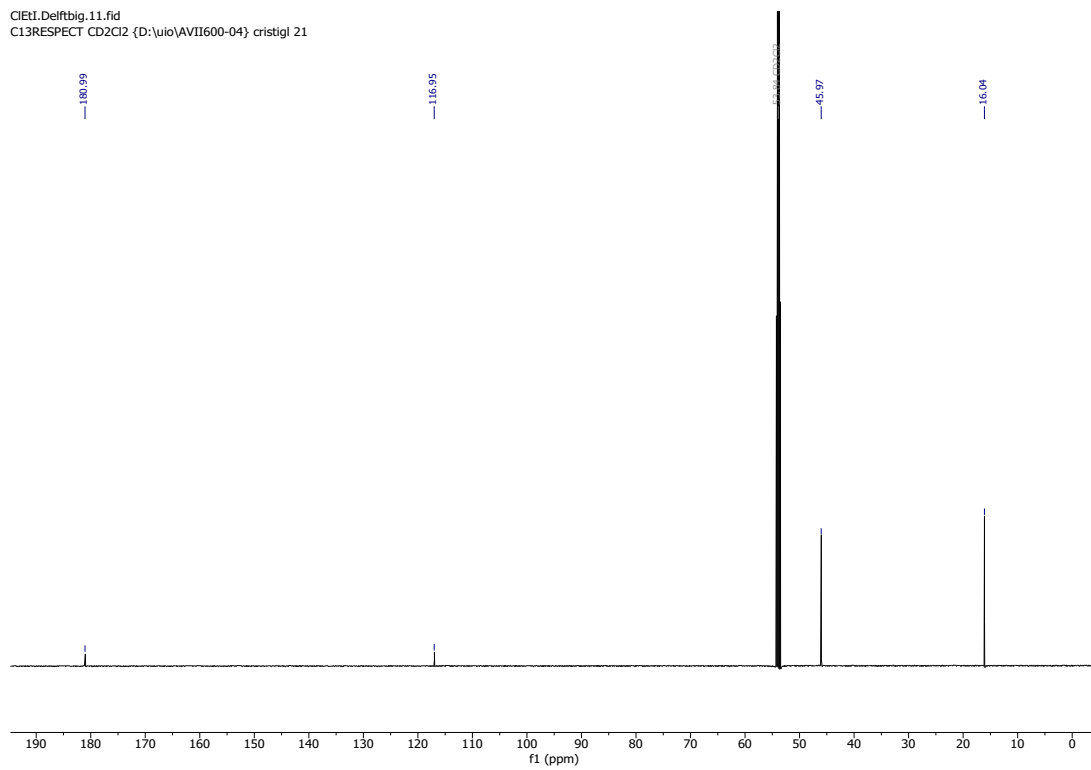

**Figure S8:**  $^{13}\text{C}$  NMR spectrum of **4** (151 MHz,  $\text{CD}_2\text{Cl}_2$ ).

Sublimation. From top to bottom in order: **5**, sublimed obtained for three different experiments at a registered temperature of: 73.3 °C, 73.2 °C, 73.3 °C.

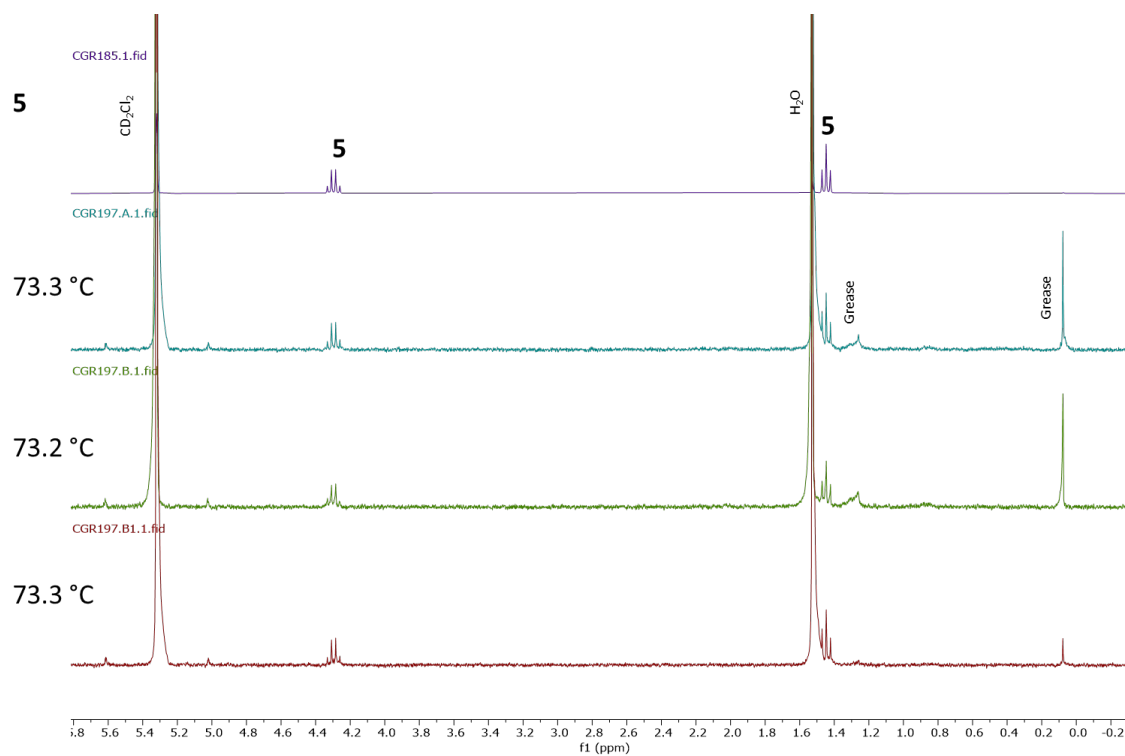

**Figure S9:** <sup>1</sup>H NMR spectra stack plot for **5** and the obtained sublimation materials (400 MHz or 300 MHz, CD<sub>2</sub>Cl<sub>2</sub>).

## 6 (N,Et)AuCl

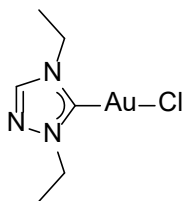

17NetCl.10.fid  
PROTON CD2Cl2 (D:\uio\AVII400-05) cristigi 23

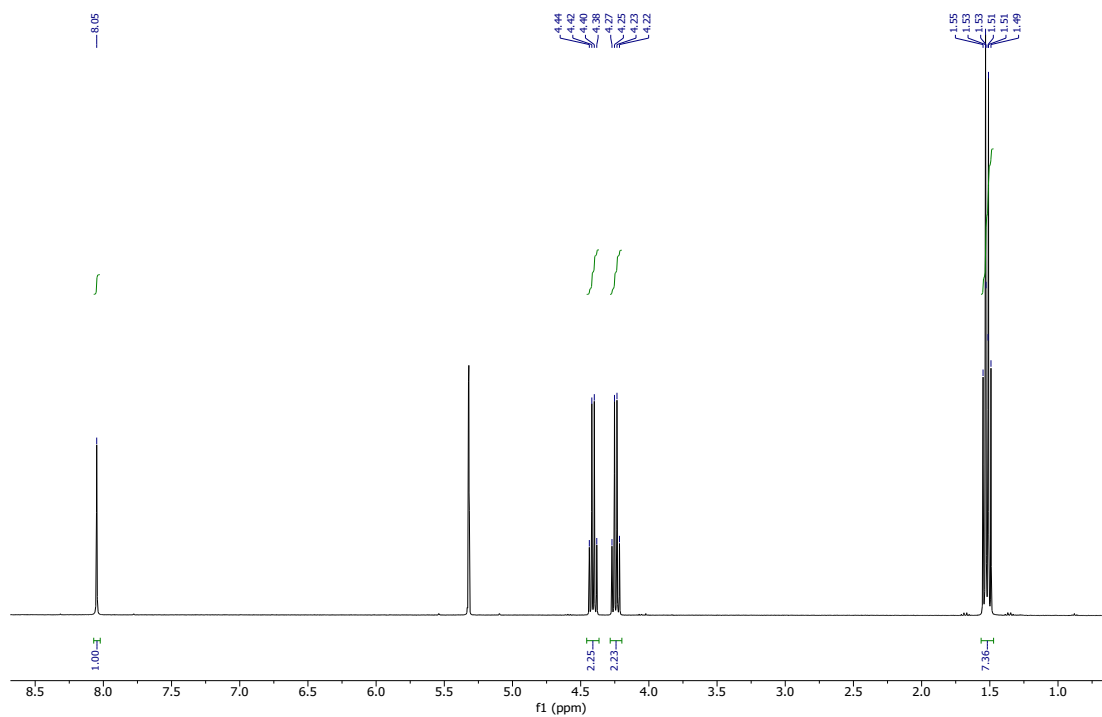

**Figure S10:**  $^1\text{H}$  NMR spectrum of 6 (400 MHz,  $\text{CD}_2\text{Cl}_2$ ).

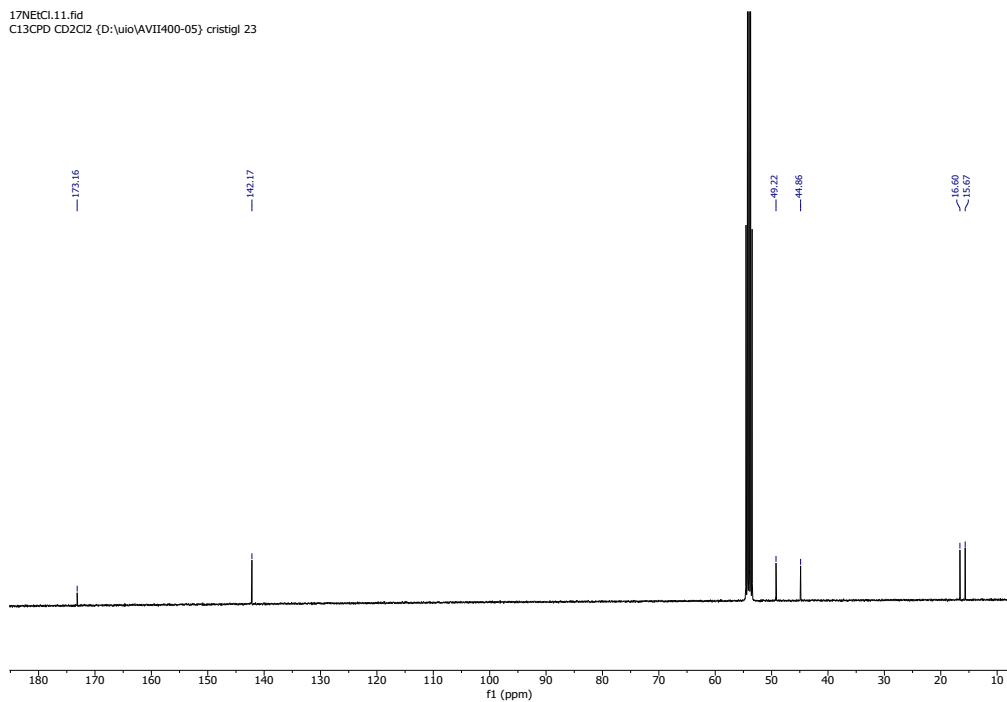

**Figure S11:**  $^{13}\text{C}$  NMR spectrum of **6** (101 MHz,  $\text{CD}_2\text{Cl}_2$ ).

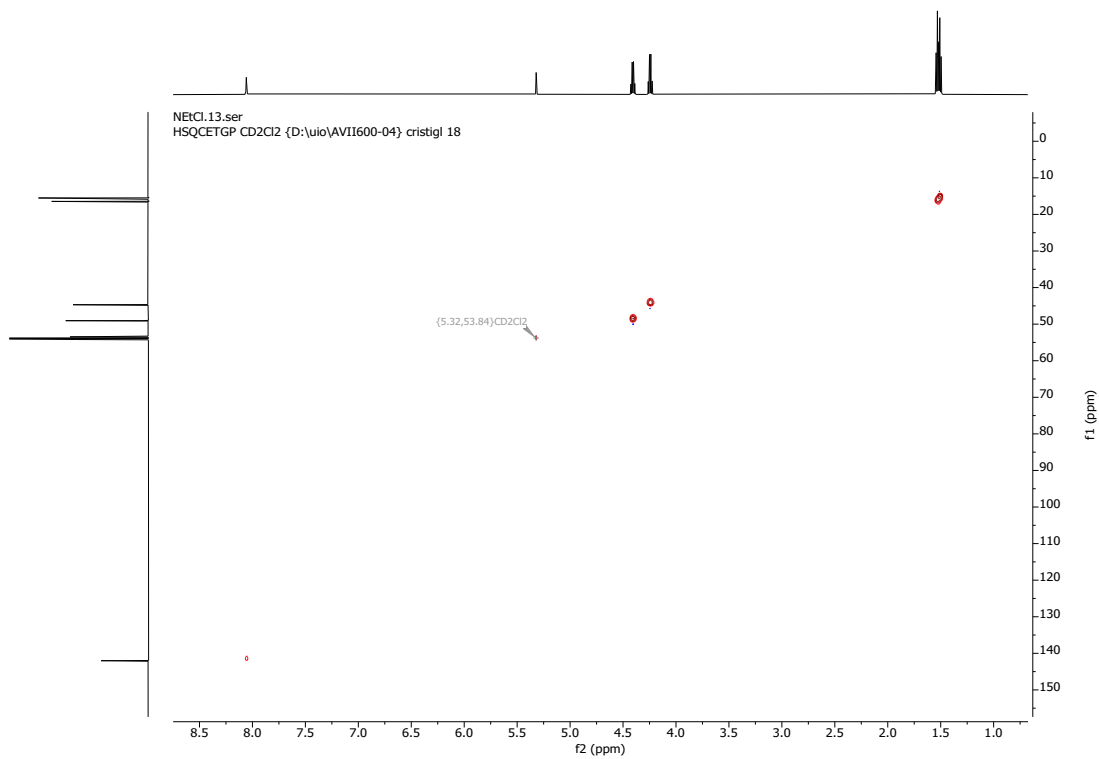

**Figure S12:**  $^1\text{H}$ - $^{13}\text{C}$  HSQC spectrum of **6** (600 MHz,  $\text{CD}_2\text{Cl}_2$ ).

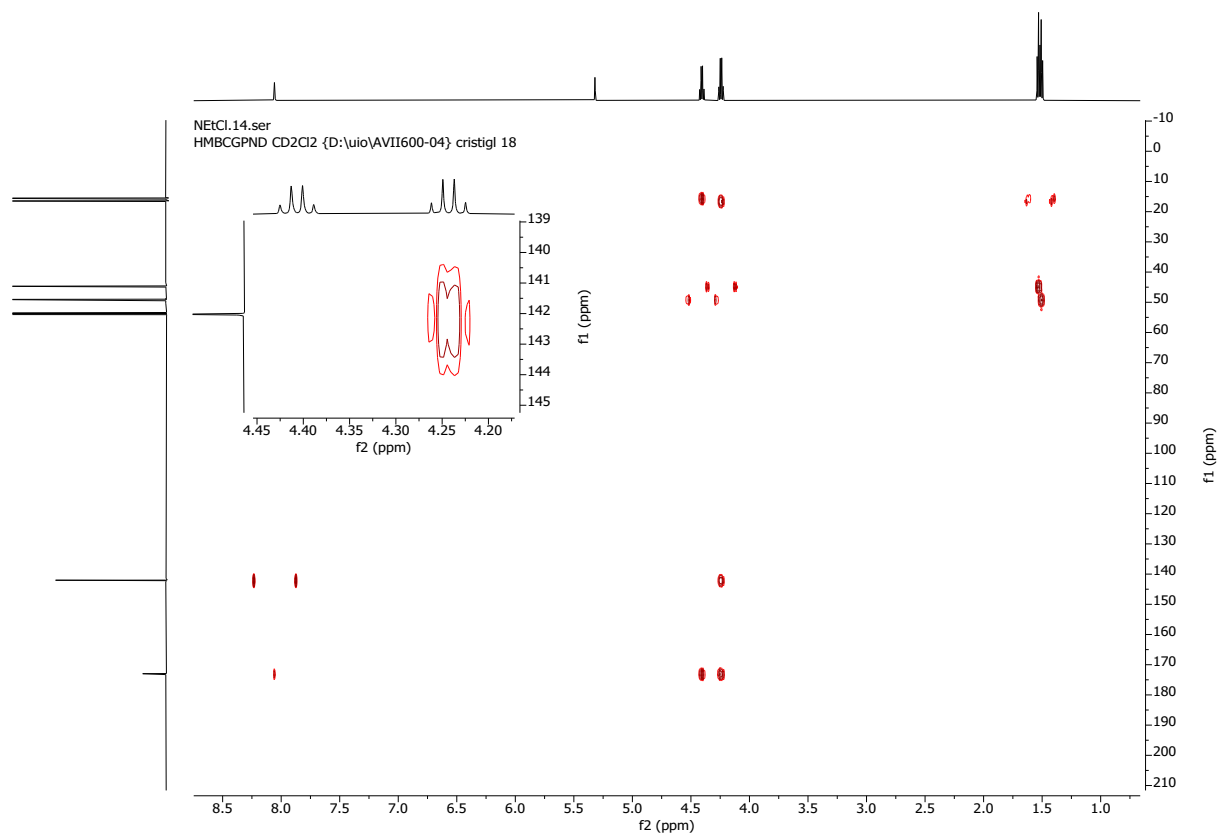

**Figure S13:**  $^1\text{H}$ - $^{13}\text{C}$  HMBC spectrum of **6** (600 MHz,  $\text{CD}_2\text{Cl}_2$ ).

Sublimation. From top to bottom in order: **6**, sublimed obtained for three different experiments at a registered temperature of: 60.2 °C, 59 °C, 60.2 °C.

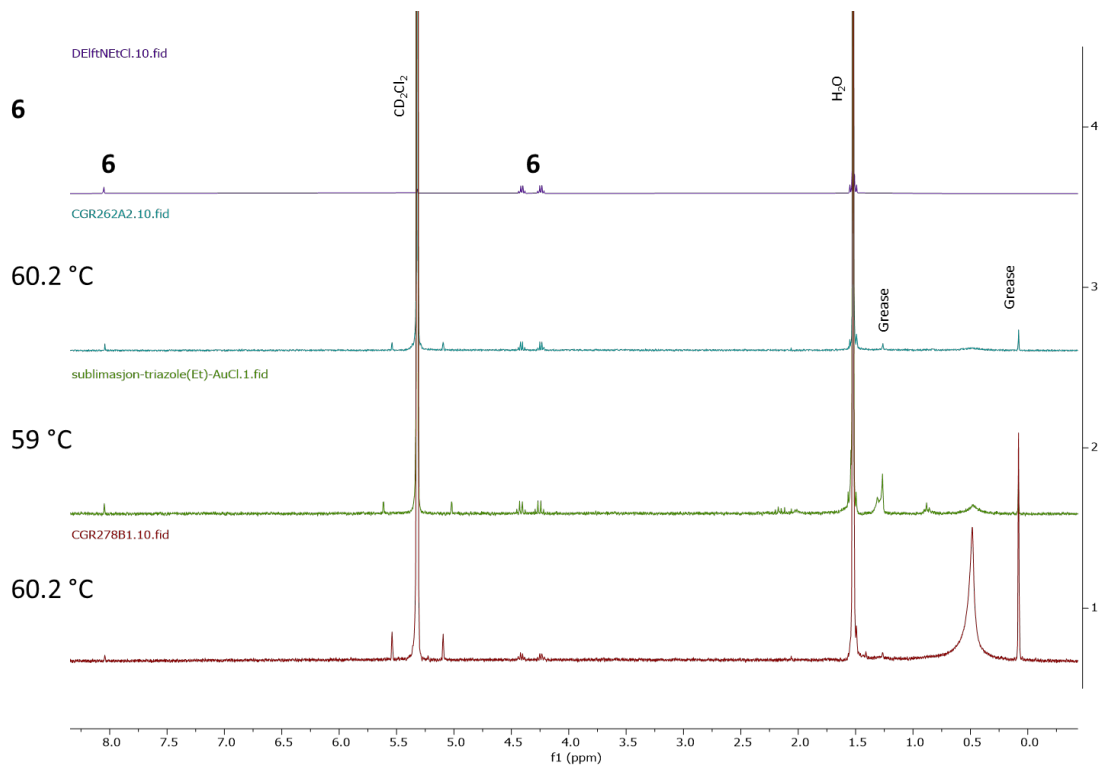

**Figure S14:** <sup>1</sup>H NMR spectra stack plot for **6** and the obtained sublimation materials (400 MHz or 300 MHz, CD<sub>2</sub>Cl<sub>2</sub>).

# 7 (Cl,Et)AuCF<sub>3</sub>

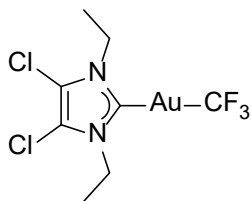

20ClEtCF3.10.fid

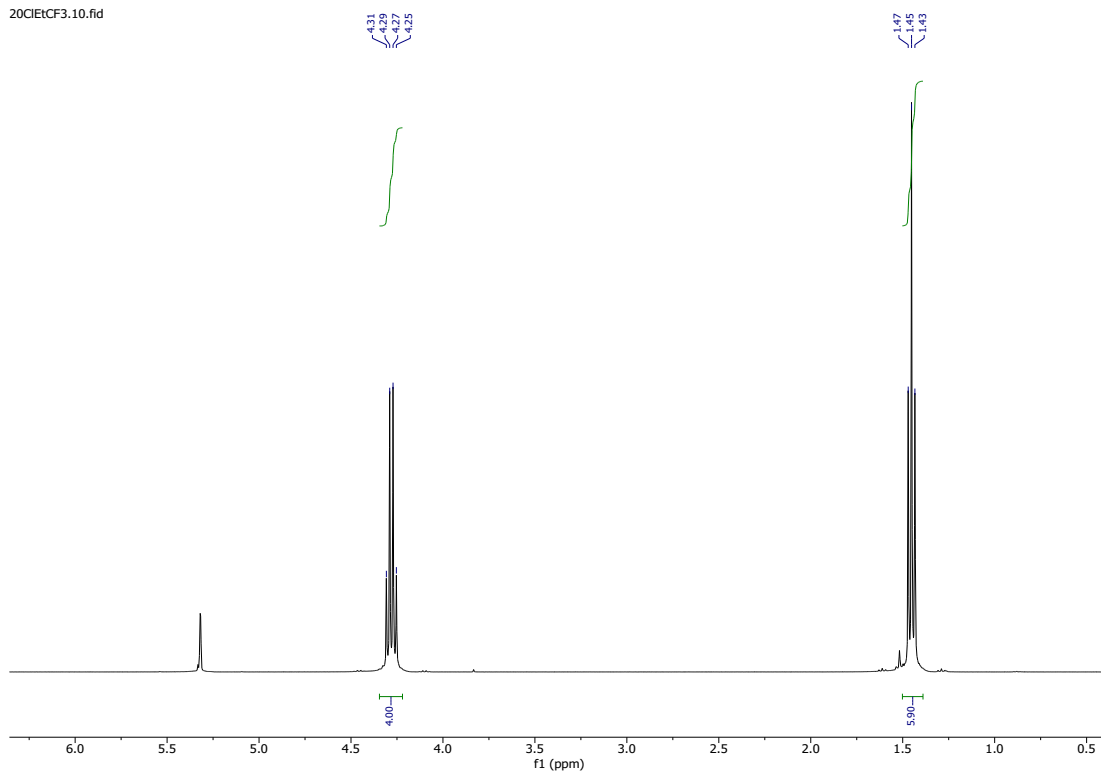

**Figure S15:** <sup>1</sup>H NMR spectrum of **6** (400 MHz, CD<sub>2</sub>Cl<sub>2</sub>).



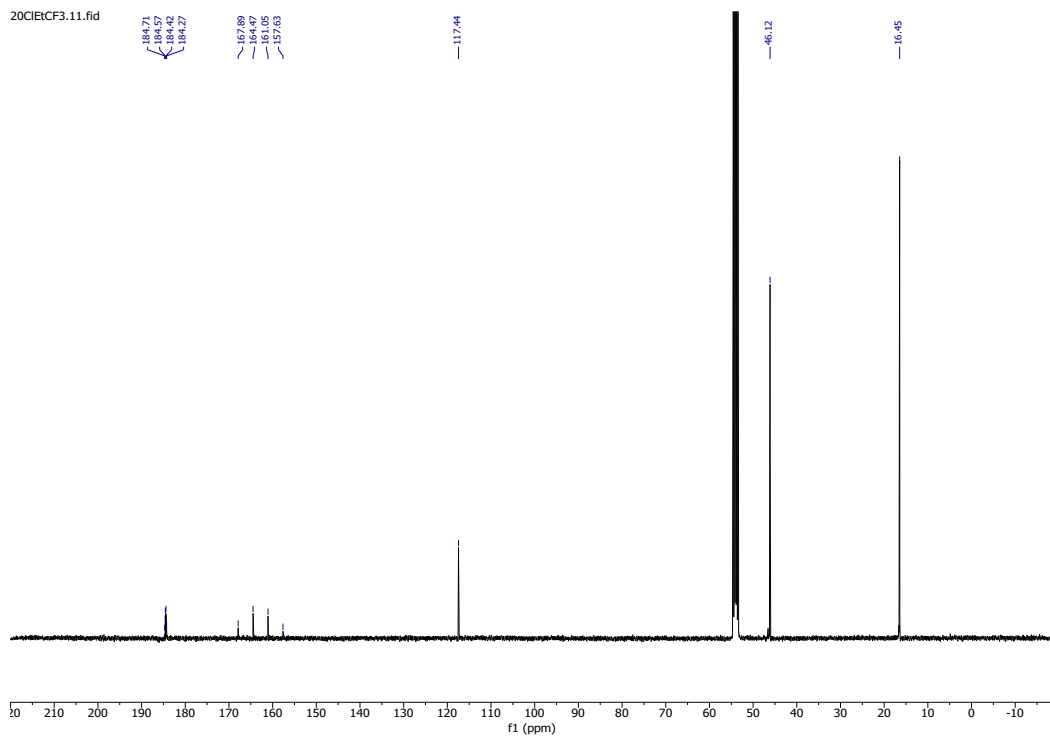

**Figure S16:**  $^{13}\text{C}$  NMR spectrum of **6** (101 MHz,  $\text{CD}_2\text{Cl}_2$ ).

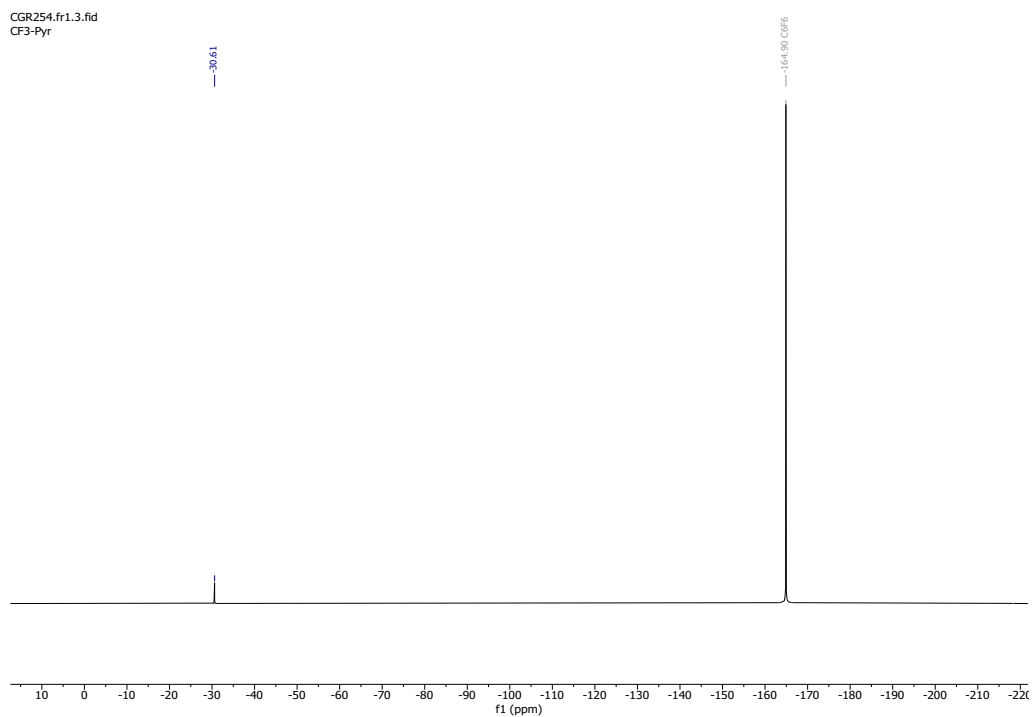

**Figure S17:**  $^{19}\text{F}$  NMR spectrum of **6** (188 MHz,  $\text{CD}_2\text{Cl}_2$ ).

Sublimation. From top to bottom in order: **6**, sublimed obtained for three different experiments at a registered temperature of: 54.9 °C, 52.8 °C, 53.1 °C. For the first experiment no heating rate is applied as immediate sublimation is observed.

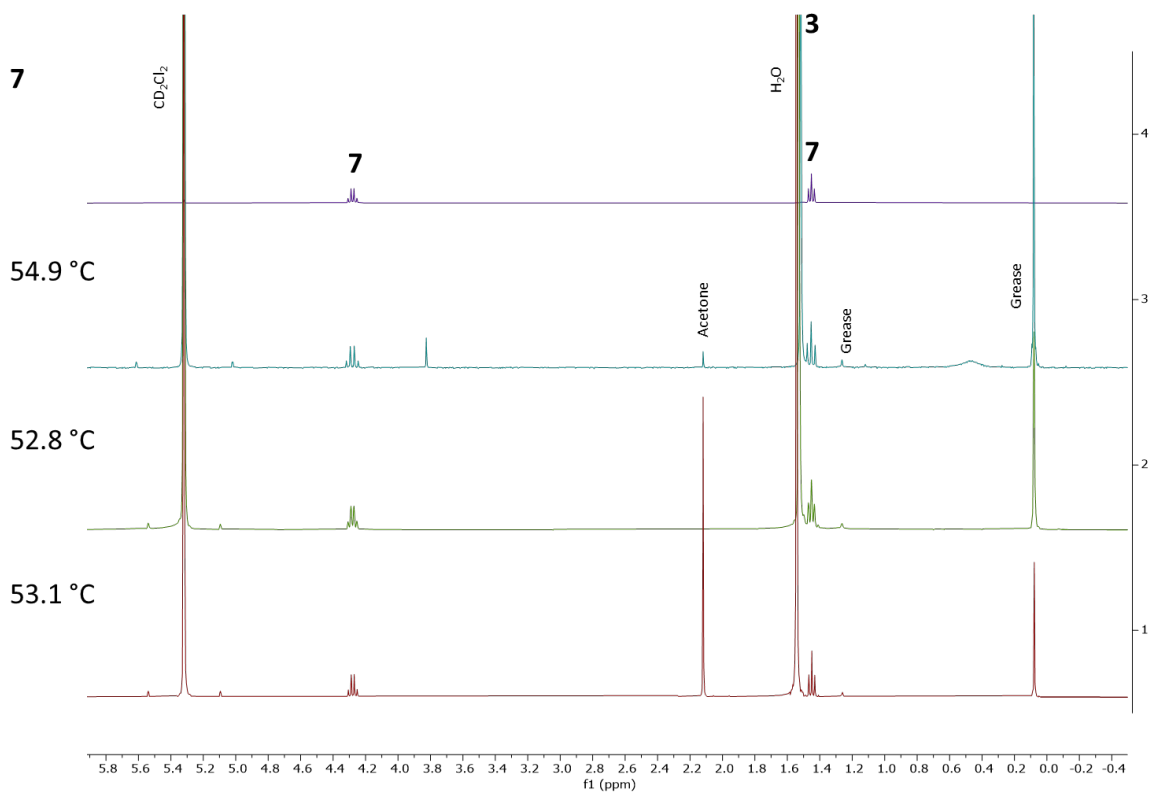

**Figure S18:** <sup>1</sup>H NMR spectra stack plot for **7** and the obtained sublimation materials (400 MHz or 300 MHz, CD<sub>2</sub>Cl<sub>2</sub>).

## Supplemental deposition data for 1–7

**Table S1:** EDX of 5 performed at 8 keV and 600 pA.

| Element | Average | Standard error |
|---------|---------|----------------|
| C       | 65.4    | 0.23           |
| N       | 10.5    | 0.23           |
| Au      | 5.0     | 0.07           |
| Si      | 13.4    | 0.13           |
| O       | 2.8     | 0.04           |
| Cl      | 0.9     | 0.02           |
| I       | 2.0     | 0.05           |

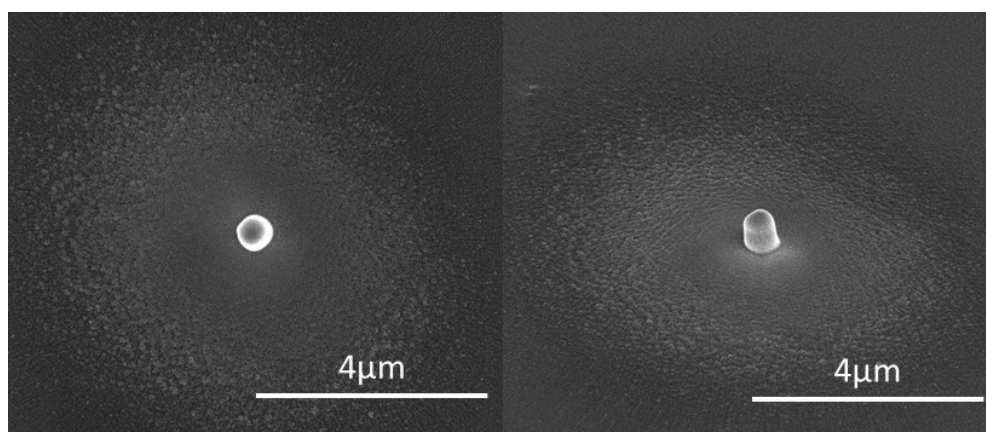

**Figure S19:**  $250 \times 250 \text{ nm}^2$  square deposits of **6** at  $100 \text{ }^\circ\text{C}$ , pitch 10 nm, dwell 500  $\mu\text{s}$ , 5 kV, 2000 passes, 600 pA, top down and  $50^\circ$  tilt. A round, very granular halo is visible.

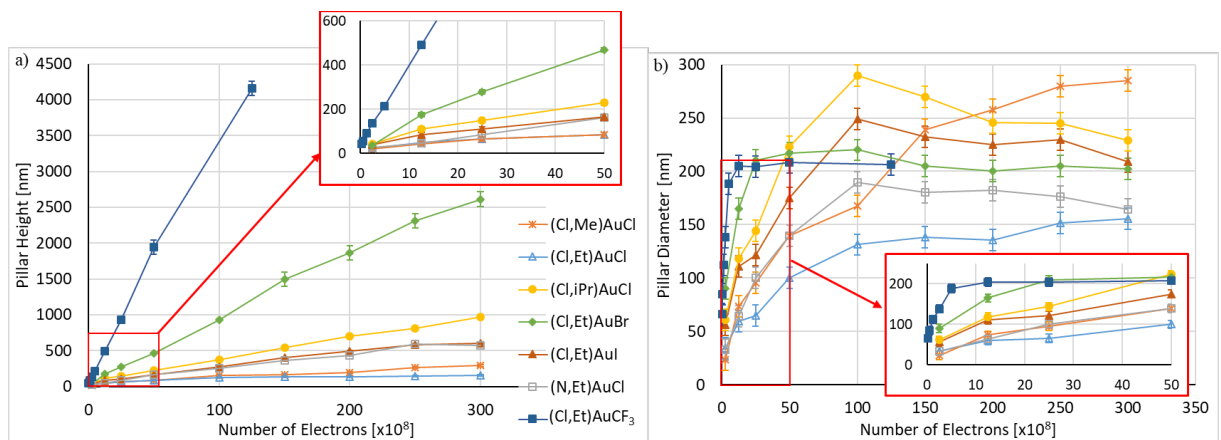

**Figure S20:** (a) Height and (b) diameter of pillars grown using a 5 kV, 40 pA beam as a function of the electron dose given as total number of primary electrons used to deposit a pillar. During all experiments the substrate and the precursor are heated together to 100 °C, except for (Cl,Me)AuCl, which was heated to 120 °C. For each precursor an array of 3 × 3 pillars was deposited. The lines between the points merely serve as a guide to the guide.
